# Supplementary material
Source: PubMed Central journal article supplement (PMC7749726)

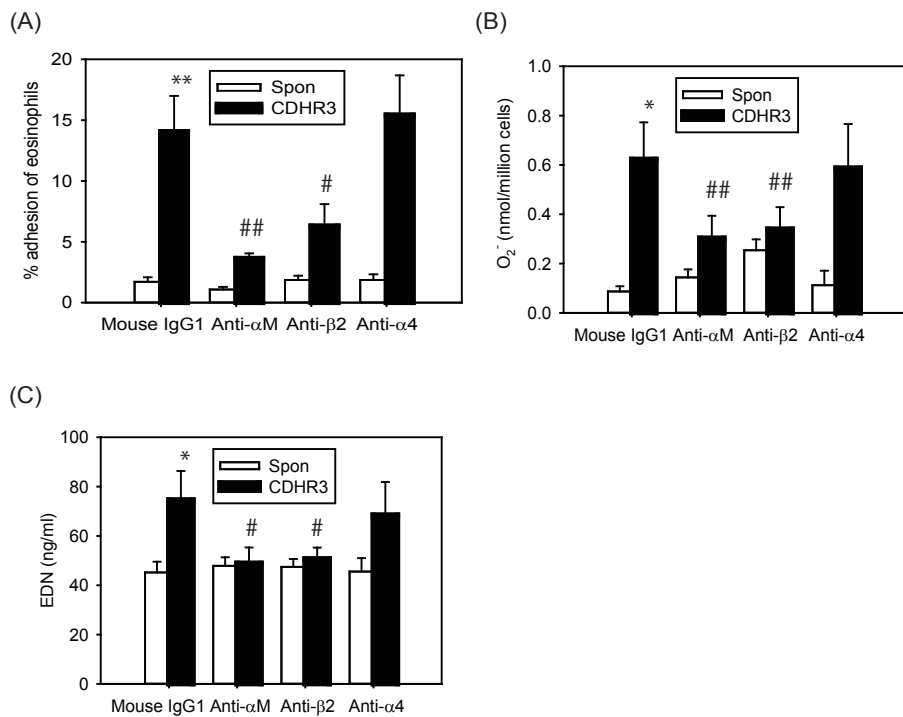

Figure S1

(A)

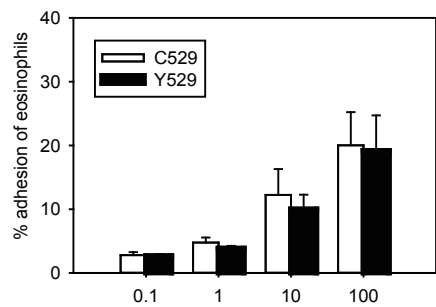

(B)

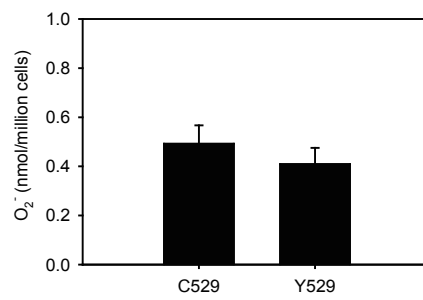

Figure S2

(A)

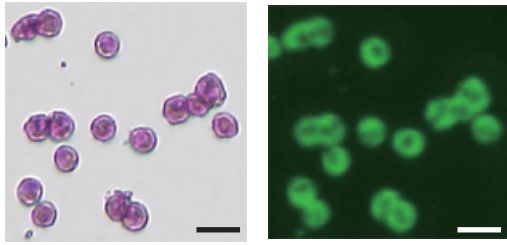

May-Grünwald-Giemsa

MBP

(B)

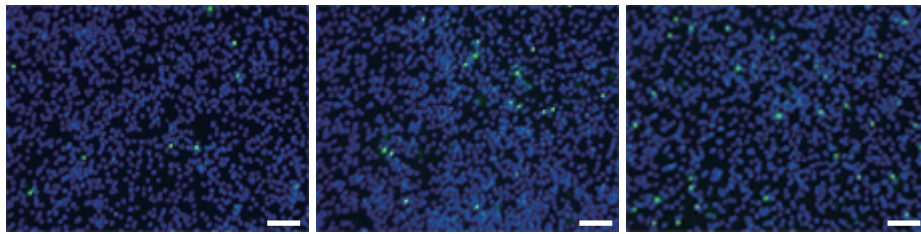

Lipo

C529

Y529

(C)

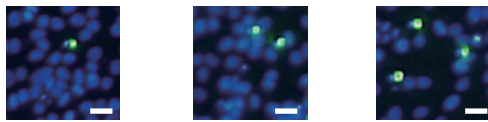

Lipo

C529

Y529

Figure S3

Supplement: NIHMS1647370-supplement-suppfigures.pdf [file NIHMS1647370-supplement-suppfigures.pdf]
